# Supplementary material for: SH3Ps—Evolution and Diversity of a Family of Proteins Engaged in Plant Cytokinesis
Source: MDPI journal article supplement (doi:10.3390/ijms20225623), 2019-11-11
Supplement: s1 [file s1]

## Supplementary data for Baquero Forero and Cvrčková: SH3Ps – evolution and diversity of a family of proteins engaged in plant cytokinesis

The supplementary materials consist of the following:

**Supplementary Figure S1:** A maximum likelihood phylogenetic tree of seed plant SH3P2 protein sequences (in this file).

**Supplementary Figure S2:** Alignment of all full-length angiosperm SH3P sequences (in this file).

**Supplementary Table S1:** Inventory of SH3P homologs in selected plant species (in a separate MS Excel spreadsheet file TableS1.xls).

**Supplementary Table S2:** List of primers used for cloning into yeast two hybrid vectors (in this file).

**Supplementary Table S3:** List of primers used for cloning into Gateway™ compatible vectors.

**Supplementary Data S1:** Structural models of Arabidopsis SH3P1, SH3P2 and SH3P3 in the standard PDB format (in a separate Zip archive file DataS1.zip). Recommended viewer: DeepView (see Ref. [64], available at <https://spdbv.vital-it.ch/>).

**Supplementary Figure S1.** A maximum likelihood phylogenetic tree of seed plant SH3P2 protein sequences. Symbols at branches denote bootstrap support (no symbols for support below 50 %), the arrow marks the position of the root of the angiosperm SH3P2 clade (with the gymnosperms serving as an outgroup). For species color-coding see Figure 1, for accession numbers of all sequences see Supplementary Table S1.

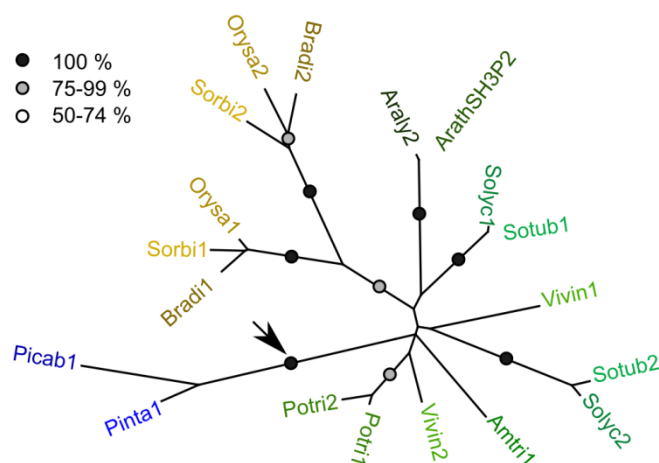

**Supplementary Figure S2.** Alignment of all full-length angiosperm SH3P sequences. Positions where amino acid category is conserved across all sequences are highlighted in green, those with amino acid category shared by all members of at least one clade and present in at least one member of another clade are shown on yellow background, clade-specific positions (i.e. those where amino acid type is shared by all members of one clade but not with other clades) are highlighted in turquoise. For amino acid categories definition see legend to Figure 3, for sequence description see Supplementary Table S1. Incomplete sequences or those lacking parts of well-conserved domains (possibly because of imperfect splicing prediction) have been omitted (*continued on next page*).

|            | 10            | 20                 | 30                     | 40           | 50           | 60          | 70      | 80               |
|------------|---------------|--------------------|------------------------|--------------|--------------|-------------|---------|------------------|
| ArathSH3P1 | MDAIRKQAAKLRQ | QVARQQQAVLKHL      | --GHV-NADAVVVDEELHCH   | QKLDLIS      | STKAARKRLRN  | IVRGLEGF    | FIATG   | YK               |
| Potri3     | MDAIKKQATRLRQ | QVARQQQAVLKHL      | --GHF-SNEGIIIVDEAELQCY | QHLQNLN      | NSRAAKHF     | QKNIVRG     | AEGFV   | SSK              |
| Potri4     | MDAEFKQATRLRQ | QVARQQQAVLKHL      | --GHL-SNEGIIIVDEAELQCY | QHLQNLN      | NSRTAKHF     | QKNIVRG     | VEGFV   | SSK              |
| Vivin3     | MDAIRKQASKLRQ | QVARQQQAVLKQL      | --GHF-GIETVVVDEAQ      | ---ROLQNL    | INSTRAKHF    | QKDIVRG     | IEGFV   | STSSK            |
| Solyc3     | MDAIKKQATKLRQ | QVARQQQAVLKQL      | --GHL-GHESVMVDEAELEI   | QRLQEL       | YMSRAAKHF    | QORDIVRG    | VEGYI   | STSSK            |
| Sotub3     | MDAIKKQATKLRQ | QVARQQQAVLKQL      | --GHL-GHESVMVDEAELEI   | QRLQEL       | YMSRAAKHF    | QORDIVRG    | VEGYI   | STSSK            |
| Amtri2     | MDTLKQASKFRQ  | QVSKQQQAVLKQF      | --STHG-GNDTVITDEAEVRC  | HKLES        | LSISTRAKHF   | QKDVVRG     | IEGLI   | STSSK            |
| Bradi3     | MDTLKQASKLRQ  | QVARQQQAVRKTF      | --STRY-NQDTSIVDEAELEC  | HNLR         | LNSTRAKHF    | QORTIVRG    | VEGFV   | AVSSK            |
| Sorbi3     | MDALKQASKLRQ  | QVARQQQAVLKQF      | --SARY-NQDPSIVDEAELEC  | QNLQRL       | LNSTRAKHF    | QORNIVRG    | VEGFIA  | ISSK             |
| Orysa3     | MDTLKQASKLRQ  | QVARQQQAVRKQF      | --SARY-NQDPSIVDEAELEC  | QNLQRL       | LNSTRAKHF    | QORSIVRG    | VEGFIA  | VS               |
| ArathSH3P2 | MDAIRKQASRLRQ | QVARQQQAVFKQFGGGGY | --GSG--LADAEALNQ       | QKLEKLY      | ISTRAKHY     | QORDIVRG    | VEGYI   | VTSSK            |
| Amtri1     | MDAIRKQATKLRQ | QVARQQQAVFKQFGGGGY | --GSG--LADAEALNQ       | QKLEKLY      | ISTRAGKH     | QFORDIVRG   | VEGFIV  | VTSSK            |
| Bradi1     | MDAIRKQASKLRQ | QVARQQQAVLKQF      | --GGGY-GADSVFADEGEAQ   | QHTKLEKLY    | ISTRAAKH     | QFORDIVRG   | VEGYI   | VTSSK            |
| Bradi2     | MDALWQASRLKQ  | QVAR--QGVFRQF      | --GGAYGNSDNAFTDESEV    | KLQRL        | EKLILSTRAAKH | QFORDIVRG   | VEGYI   | VTSSK            |
| Orysa1     | MDAIRKQASKLRQ | QVARQQQAVMKQF      | --GGGY-GADGAFADAEACQ   | MSKLEKLY     | ISTRAAKH     | QFORDIVRG   | VEGYI   | VTSSK            |
| Orysa2     | MDALWQASRLKQ  | QVSR--QGVFKQF      | --GAAYGNSDNAFTDESEV    | NLQRL        | EKLILSTRAAKH | QFORDIVRG   | VEGYI   | VTSSK            |
| Potri1     | MDAIRKQATKLRQ | QVARQQQAVLKQFGGGGY | --GSG--LADAEALNQ       | QKLEKLY      | ISTRAGKH     | QFORDIVRG   | VEGYI   | VTSSK            |
| Potri2     | MDAIRKQATKLRQ | QVARQQQAVLKQFGAGGY | --GSD--LVTDEAEMQ       | QHKLERLY     | ISTRAGKH     | QFORDIVRG   | VEGYI   | VTSSK            |
| Solyc1     | MDAIRKQATRLRQ | QVARQQQAVLKQFGAGGY | --GSD--LVTDEAEMQ       | QHKLERLY     | ISTRAGKH     | QFORDIVRG   | VEGYI   | VTSSK            |
| Solyc2     | MSIRKQATKLRQ  | QVARQQQAVFKQF      | --SSGLGGPDNSVTDEVEL    | QOQKLEKLY    | ISTRAGKH     | QFORDIVRG   | VEGYI   | ITSSK            |
| Sotub1     | MDAIRKQATRLRQ | QVARQQQAVLKQFGAGGY | --GSD--LVTDEAEMQ       | QHKLERLY     | ISTRAGKH     | QFORDIVRG   | VEGYI   | VTSSK            |
| Sotub2     | MDSIRKQATKLRQ | QVARQQQAVFKQF      | --SSGLGGPDNSVTDEVEL    | QOQKLEKLY    | ISTRAGKH     | QFORDIVRG   | VEGYI   | ITSSK            |
| Sorbi1     | MDAIRKQASKLRQ | QVARQQQAVMKQF      | --GGGY-GADGVFADEGEAQ   | MSKLEKLY     | ISTRAAKH     | QFORDIVRG   | VEGYI   | VTSSK            |
| Sorbi2     | MDALWQASRLKQ  | QVAR--QGVFKQF      | --GYGNSDNAFTDESEV      | KLQRL        | EKLILSTRAAKH | QFORDIVRG   | VEGYI   | VTSSK            |
| Vivin1     | MDAIRKQATKIIQ | QVARQQQAVLKQFGGGGY | --GSD--LVTDEAEMQ       | QHKLERLY     | ISTRAGKH     | QFORDIVRG   | VEGFIV  | VTSSK            |
| Vivin2     | MDAIRKQASKFRQ | QVARQQQAVLKQFGGGGY | --GSD--LVTDEAEMQ       | QHKLERLY     | ISTRAGKH     | QFORDIVRG   | VEGFIV  | VTSSK            |
| ArathSH3P3 | MDAFRRQASKLRQ | QVARQQQAVIKQFSGTG  | YESSDMVIDE             | LEMQHQLDKL   | RSTRSAKE     | QFORDIVR    | GAFTAI  | SVK              |
| Bradi4     | MDAIRKQASKFKQ | QVARQQQAVIKQFSTTG  | YERSDSVVIDE            | LEMQHQLDKL   | SSRSGRDF     | QKDIVR      | AGFVSI  | SSK              |
| Orysa4     | MDVLRKQASKFKQ | QVARQQQAVIKQFSTTG  | YEHSDAVVIDE            | LEMQHQLDKL   | SSRSGRDF     | QKDIVR      | AGFVSI  | SSK              |
| Potri5     | MDALRQASKLRQ  | QVARQQQAVIKQFSSTG  | YESSDMVIDE             | LEMQHQLDKL   | SSRSGRDF     | QKDIVR      | AGFVSI  | SSK              |
| Solyc4     | MDALRQASKLRQ  | QVARQQQAVIKQFSATG  | YESSDMVIDE             | LEMQHQLDKL   | SSRSGRDF     | QKDIVR      | AGFVSI  | SSK              |
| Sotub4     | MDALRQASKLRQ  | QVARQQQAVIKQFSATG  | YESSDMVIDE             | LEMQHQLDKL   | SSRSGRDF     | QKDIVR      | AGFVSI  | SSK              |
| Sorbi4     | MDALRQASKFKQ  | QVARQQQAVIKQFSTTG  | YERSDSVVIDE            | LEMQHQLDKL   | SSRSGRDF     | QKDIVR      | AGFVSI  | SSK              |
| Vivin4     | MDALRQASKFRQ  | QVARQQQAVIKQFGGTG  | YESSDMVIDE             | LEMQHQLDKL   | RSTRAGK      | DFQDIVR     | AGFVSI  | SSK              |
| ArathSH3P1 | VVEIGLKF      | FAEDFKKYG          | DENPDA--NTP--LSRVA     | HHFGTHYKSV   | EGERETLL     | GVLSQVCE    | IRTM    | YISABIEDARHLVNH  |
| Potri3     | QMEILRL       | LADECKKYG          | AEHQSE--NNY--VARTV     | LQFGASHNL    | MENKEILL     | GVLDQVSK    | LRALIT  | GABIEDARHLTHRY   |
| Potri4     | QMEMLRL       | LADECKKYG          | AEHQSE--NNY--VARAV     | LQFGASHNL    | MENKETIV     | GVLDQVSK    | LRALIT  | GABIEDARRLTHH    |
| Vivin3     | QMEIVRMA      | EDCKKYG            | ETENQST--GSP--LARAALY  | FGNTHSSMEK   | RETL         | GVFCQVSE    | LRVLIT  | GABIEDARHLTHRY   |
| Solyc3     | QVEIAR        | KLVDNCKYK          | GEIQNG--PST--LQKVA     | VEGTHHAAMED  | REIM         | GVLSQVCE    | LRASIH  | GABIEDARHLTHSY   |
| Sotub3     | QVEIAR        | KLVDNCKYK          | GEIQNG--PST--LQKVA     | VEGTHHAAMED  | REIM         | GVLSQVCE    | LRASIH  | GABIEDARHLTHSY   |
| Amtri2     | QMEIATK       | LADDECKKYG         | ENESHSS--NTT--LASAS    | RQFCTRN      | SMESREN      | LRRILSTQVSE | LRAMVM  | GABIEDARLLTHRY   |
| Bradi3     | QMEIVK        | LAEDECKKYG         | NNNQNL--GFV--LGIAS     | VEFGKHTQ     | MEIREK       | LLKVLGEQVFE | LRREMIM | SABIEDARLLITYRY  |
| Sorbi3     | QMEIVK        | LAEDECKKYG         | CNDNQHF--GFA--LARASEE  | FGKHQ        | QIEKRED      | LLKSLGEQVFE | LRREMIM | SABIEDARLLITYRY  |
| Orysa3     | QMEIVK        | LAEDECCR           | YGNNDNQF--GFI--LARAS   | VEFGNTHSQMEK | REN          | LLKFLGEQVFE | LRREMIM | SABIEDARLLITYRY  |
| ArathSH3P2 | QVEIGTK       | LSEDSRKYG          | ENCTCTSGNT--LTRAALN    | YGRARAQMEK   | RGNNL        | KALGTQVAE   | LRAMVL  | GABIEDARHLAORY   |
| Amtri1     | QVEIGTK       | LSEDSRKYG          | ENCTCTSGGT--LAKAALS    | YGRARAQTEK   | RGNNL        | HKALGTQVAE  | LRAMVL  | GABIEDARHLAORY   |
| Bradi1     | QVEIGNK       | LCEDEGKKYG         | VENTCTSGST--LSRAALS    | YGRARSRLMEK  | RGNNL        | KAFGTQVAE   | LRAMVM  | GABIEDARHLAORY   |
| Bradi2     | QVEIGNK       | LCEDEGKKYG         | VENTCTSGNT--LSKAATY    | YGRARSRLMEK  | RGNNL        | KAFGTQVAE   | LRAMVM  | GABIEDARHLAORY   |
| Orysa1     | QVEIGNK       | LCEDEGKKYG         | VENTCTSGST--LSKAALC    | YGRARSRLMEK  | RGNNL        | KALGTQVAE   | LRAMVM  | GABIEDARHLAORY   |
| Orysa2     | QVEIGNK       | LSDDEGKKYG         | ENTCTCTSGNT--LSKAAMY   | YGRARSRLMEK  | RGNNL        | RAFGTQVAE   | LRAMVM  | GABIEDARHLAORY   |
| Potri1     | QVEIGTK       | FSEDSRKYG          | ENCTCTSGNT--LSKAAVN    | YGRARAQMEK   | RGNNL        | KALGTQVAE   | LRAMVM  | GABIEDARHLAORY   |
| Potri2     | QVEIGTR       | FSEDSRKYG          | ENCTCTSGNT--LSKAAVN    | YGRARAQMEK   | RGNNL        | KALGTQVAE   | LRAMVM  | GABIEDARHLAORY   |
| Solyc1     | QVEIGTK       | LSEDSRKYG          | ENCTCTSGTT--LSKAALG    | YGRARAQMEK   | RGNNL        | KALGTQVAE   | LRAMVM  | GABIEDARHLAORY   |
| Solyc2     | QVEIGTK       | LSEDSRKYG          | ENKCTSGST--LSKAALS     | YGRARAQTEK   | RED          | LLKALGTQVAE | LRAMV   | GABIEDARHLAORY   |
| Sotub1     | QVEIGTK       | LSEDSRKYG          | ENCTCTSGTT--LSKAALG    | YGRARAQMEK   | RGNNL        | KALGTQVAE   | LRAMVM  | GABIEDARHLAORY   |
| Sotub2     | QVEIGTK       | LSEDSRKYG          | ENCTCTSGST--LSKAALS    | YGRARAQTEK   | RED          | LLKSLGTQVAE | LRAMV   | GABIEDARHLAORY   |
| Sorbi1     | QVEIGNK       | LCEDEGKKYG         | ENTCTCTSGST--LSKAALS   | YGRARSRLMEK  | RGNNL        | KALGTQVAE   | LRAMVM  | GABIEDARHLAORY   |
| Sorbi2     | QVEIGNK       | LSDDEGKKYG         | ENTCTCTSGTT--LSKAATY   | YGRARSRLMEK  | RGNNL        | KAFGTQVAE   | LRAMVM  | GABIEDARHLAORY   |
| Vivin1     | QVEIGTK       | LSEDSRKYG          | ENCTCTSGST--LSKAALS    | YGRARAQMEK   | RGNNL        | KALGTQVAE   | LRAMVM  | GABIEDARHLAORY   |
| Vivin2     | QVEIGTK       | LSEDSRKYG          | ENTCTCTSGNT--LSKAALN   | YGRARAQTEK   | RGNNL        | KALGTQVAE   | LRAMVM  | GABIEDARHLAORY   |
| ArathSH3P3 | HIVAGTK       | LSEDCCR            | YGNENQNDENI--LAKAA     | ATVCDARKH    | VDKQED       | FNKLLASQVLD | LRAMV   | AGSABIEDARHLAORY |
| Bradi4     | HIVVGTK       | FSEDCFR            | YGENNAD--EEA--LAKAAS   | LGGALRN      | VEKYEYED     | FSRTLSSQTID | LRAMAT  | CVABIEDARGLAORY  |
| Orysa4     | HIVVGTK       | FSEDCFR            | YGENNAD--EEA--LAKAAS   | LGGALRN      | VEKYEYED     | FSRTLSSQTID | LRAMAT  | CVABIEDARGLAORY  |
| Potri5     | HIVAGTK       | LSEDCCR            | YGTENIN--ENI--LAKAA    | ATVCDARKH    | VEQED        | LNLLFSQILD  | LRAMIT  | DSABIEDARHLAORY  |
| Solyc4     | HIVAGTK       | LSEDCCR            | YGTENIN--DEV--LAKAAS   | ITVCDARKH    | VEQED        | LNLLFSQILD  | LRAMV   | AGSABIEDARHLAORY |
| Sotub4     | HIVTGTK       | LSEDCCR            | YGTENIN--DEV--LAKAAS   | ITVCDARKH    | VEQED        | LNLLFSQILD  | LRAMV   | AGSABIEDARHLAORY |
| Sorbi4     | HIVVGTK       | FSEDCFR            | YGTENIN--DEA--LAKAAS   | LGGALRN      | IEKYEYED     | FSRTLSSQTID | LRSMAM  | AGSABIEDARGLAORY |
| Vivin4     | QIVTGTK       | LSEDCCR            | YGTENIN--DNI--LAKAAS   | ITVCDARKH    | IAQED        | LNLLSSQILD  | LRAMV   | TGABIEDARHLAORY  |

|            | 170      | 180                  | 190           | 200             | 210          | 220       | 230     | 240          |
|------------|----------|----------------------|---------------|-----------------|--------------|-----------|---------|--------------|
| ArathSH3P1 | DRLRQEV  | LAQATDVLRRRSKLKESDIS | EAYIKLKN      | ESRLAELKSSMKTLC | ETKINLE      | VOD       | QONV    | YSORIRALVE   |
| Potri3     | DKLRLQEV | LAQAAEVLRRSKTRDSEIS  | ASCMKLQAP     | EARLT           | TELKSTVMALGR | ETAMSSSV  | ENQOE   | ETACRLFSMDA  |
| Potri4     | DKLQRAV  | VQAAEVLRCRSTKTRDSEIS | ASCTKLRA      | EARL            | ELKSTVMALGR  | ETAMSSSV  | ENQOE   | ETACRLFSMDA  |
| Vivin3     | ERLRQEV  | LSQAADVLRRQAKFRPATSA | SSIKLQSE      | AKLSE           | ELKSTVMALGR  | ETAMSSSV  | ENQOE   | ETACRLFSMDA  |
| Solyc3     | DRMRQEF  | FSQATEVIRROSKFRE     | --ASTSLAKLKN  | ETRLSELK        | SVLVLGKE     | TDMLSV    | EEBQOE  | ETFOKLLIMVDA |
| Sotub3     | DRMRQEF  | FSQATEVIRROSKFRE     | --ASTSLAKLKN  | ETRLSELK        | SVLVLGKE     | TDMLSV    | EEBQOE  | ETFOKLLIMVDA |
| Amtri2     | DRIRQEV  | LAQVAEVRRLQAKLKEP    | GANASAYKLQNE  | FMKLS           | ELKSSLSALGKE | ATAAMSSV  | EAQOE   | ETACRLFSMDA  |
| Bradi3     | QRIRQDM  | FSQIADVMRKQLKSKESSEN | SD-SLKLQH     | ESKLSEL         | RTTLAALGR    | ETAMSSSV  | EAQOE   | ETACRLFSMDA  |
| Sorbi3     | QRIRQDM  | FSQIADVMRKQLKSKESSEN | NTNSVKLQH     | ESKLSEL         | RTTLAALGR    | ETAMSSSV  | EAQOE   | ETACRLFSMDA  |
| Orysa3     | QRIRQDM  | FSQIADVMRKQLKSKESSEN | NTNSVKLQH     | ESKLSEL         | RTTLAALGR    | ETAMSSSV  | EAQOE   | ETACRLFSMDA  |
| ArathSH3P2 | DRMRQEA  | LAQATEVARQAKARE      | ESQGNPILMKLES | EAKLHOLK        | ENMTILCKE    | ASALASV   | EDQOE   | ETACRLFSMDA  |
| Amtri1     | DRMRQEA  | LAQAI                | EVSKROMVRE    | EGTGNVNSAKLDA   | EAKLHOLK     | ENMTILCKE | ASALASV | EDQOE        |
| Bradi1     | DRMRQEA  | LAQAI                | EVSKROMVRE    | EGTGNVNSAKLDA   | EAKLHOLK     | ENMTILCKE | ASALASV | EDQOE        |
| Bradi2     | DRMRQEA  | LAQAVV               | EVSRQONVRE    | ESAGNGE         | VISKLEA      | EYKLE     | ELKSNM  | VGLCKE       |
| Orysa1     | DRMRQEA  | LAQAI                | EVSKROMVRE    | EGTGNVNSAKLDA   | EAKLHOLK     | ENMTILCKE | ASALASV | EDQOE        |
| Orysa2     | DRMRQEA  | LAQAV                | EVSRQONVRE    | ESAGNGE         | VISKLEA      | EYKLE     | ELKSNM  | VGLCKE       |
| Potri1     | DRMRQEA  | LAQAI                | EVSKROMVRE    | EGTGNVNSAKLDA   | EAKLHOLK     | ENMTILCKE | ASALASV | EDQOE        |
| Potri2     | DRMRQEA  | LAQAI                | EVSKROMVRE    | EGTGNVNSAKLDA   | EAKLHOLK     | ENMTILCKE | ASALASV | EDQOE        |
| Solyc1     | DRMRQEA  | LAQAV                | EVSRQONVRE    | ESAGNGE         | VISKLEA      | EYKLE     | ELKSNM  | VGLCKE       |
| Solyc2     | DRVRQEA  | LAQAI                | EVSRQONVRE    | ESAGNGE         | VISKLEA      | EYKLE     | ELKSNM  | VGLCKE       |
| Sotub1     | DRMRQEA  | LAQAV                | EVSRQONVRE    | ESAGNGE         | VISKLEA      | EYKLE     | ELKSNM  | VGLCKE       |
| Sotub2     | DRVRQEA  | LAQAI                | EVSRQONVRE    | ESAGNGE         | VISKLEA      | EYKLE     | ELKSNM  | VGLCKE       |
| Sorbi1     | DRMRQEA  | LAQAI                | EVSKROMVRE    | EGTGNVNSAKLDA   | EAKLHOLK     | ENMTILCKE | ASALASV | EDQOE        |
| Sorbi2     | DRMRQEA  | LAQAVV               | EVSRQONVRE    | ESAGNGE         | VISKLEA      | EYKLE     | ELKSNM  | VGLCKE       |
| Vivin1     | ERMRMEA  | LAQAI                | EVSKROMVRE    | EGTGNVNSAKLDA   | EAKLHOLK     | ENMTILCKE | ASALASV | EDQOE        |
| Vivin2     | ERMRMEA  | LAQAI                | EVSKROMVRE    | EGTGNVNSAKLDA   | EAKLHOLK     | ENMTILCKE | ASALASV | EDQOE        |
| ArathSH3P3 | SRMRQEA  | THATEVSRQONVRE       | -API          | ENVAKLQ         | ELKSNM       | VGLCKE    | ASALASV | EDQOE        |
| Bradi4     | SRMRHEA  | ILSAEIAARKAVRE       | -SPIA         | NTTKLQ          | ELKSNM       | VGLCKE    | ASALASV | EDQOE        |
| Orysa4     | SRMRHEA  | ILSAEIAARKAVRE       | -APLA         | HTTKLQ          | ELKSNM       | VGLCKE    | ASALASV | EDQOE        |
| Potri5     | SRMRHEA  | ILSAEIAARKAVRE       | -SPIA         | NTTKLQ          | ELKSNM       | VGLCKE    | ASALASV | EDQOE        |
| Solyc4     | SKMRQEA  | ILQATEVSRQONVRE      | -API          | ENVAKLH         | ELKSNM       | VGLCKE    | ASALASV | EDQOE        |
| Sotub4     | SKMRQEA  | ILQATEVSRQONVRE      | -API          | ENVAKLH         | ELKSNM       | VGLCKE    | ASALASV | EDQOE        |
| Sorbi4     | SRMRHEA  | ILSAEIAARKAVRE       | -API          | HTTKLQ          | ELKSNM       | VGLCKE    | ASALASV | EDQOE        |
| Vivin4     | SRMRHEA  | ILQATEVSRQONVRE      | -API          | ENVAKLH         | ELKSNM       | VGLCKE    | ASALASV | EDQOE        |



|            | 330              | 340              | 350   | 360           | 370              | 380              | 390 | 400 |
|------------|------------------|------------------|-------|---------------|------------------|------------------|-----|-----|
| ArathSH3P1 | TKPSPKDEMKSSPQEE | TKSNHQKEIKSSPQEE | IKKSN | GSDDHHNHQLLSQ | NDSEFLAKVHPFDAQ  | PGELSLAVDDYVI    |     |     |
| Potri3     |                  |                  |       |               | DALYIAKVIHPFDAQ  | EGELSLFIDDFVV    |     |     |
| Potri4     |                  |                  |       |               | DGLFLAKVIHPFDAQ  | EGELSLSVDDFVV    |     |     |
| Vivin3     |                  |                  |       |               | GSYFLAKVIHPFDAQ  | DGELSLSVDDYVV    |     |     |
| Solyc3     |                  |                  |       |               | PTYFLAKVMHSEDAQ  | DGELSLLEVGDYVV   |     |     |
| Sotub3     |                  |                  |       |               | PTYFLAKVMHSEDAQ  | DGELSLLEVGDYVV   |     |     |
| Amtri2     |                  |                  |       |               | AMYFLAEVLHPFDAQ  | EGELSLSVGDYVV    |     |     |
| Bradi3     | SEPTR            |                  |       |               | NSQEVHVEVHPFDAQ  | DGELINISVGDYVV   |     |     |
| Sorbi3     | SESTG            |                  |       |               | NSQEVQVEVHPFDAQ  | DGELISLAVGEYVV   |     |     |
| Orysa3     | SEPTR            |                  |       |               | NGQEVHVEVHPFDAQ  | DGELISISVGDYVV   |     |     |
| ArathSH3P2 |                  |                  |       |               | MGYFLCEVLFPPYHGV | DVELSLSTGEYVV    |     |     |
| Amtri1     |                  |                  |       |               | SSYFLCEVMHPYRAE  | DVELISLSVGDYVV   |     |     |
| Bradi1     |                  |                  |       |               | VEHFLAEALQSYRAE  | ETELINLSLSTGEYIV |     |     |
| Bradi2     |                  |                  |       |               | VDFFLCEALDSFKAE  | ESELINLSLGDIVI   |     |     |
| Orysa1     |                  |                  |       |               | VEFLAEALQSYRAE   | ETELINLAAGDYIV   |     |     |
| Orysa2     |                  |                  |       |               | VDFFLCEALDSFKAE  | ESELINLSAGDIIV   |     |     |
| Potri1     |                  |                  |       |               | ISYFLCEVMHSTQGG  | DVELTILSIGDYVV   |     |     |
| Potri2     |                  |                  |       |               | MGYFLCEVMHSTQGG  | DVELTILSIGDFVV   |     |     |
| Solyc1     |                  |                  |       |               | MGYFLCEVMYPYQAE  | DVELINLSVGEYIV   |     |     |
| Solyc2     |                  |                  |       |               | TTYFLAEVHPYEA    | DVELTLLIGDYVV    |     |     |
| Sotub1     |                  |                  |       |               | MGYFLCEVMYPYQAE  | DVELINLSVGEYIV   |     |     |
| Sotub2     |                  |                  |       |               | TTYFLAEVHPYEA    | DVELTLLIGDYVV    |     |     |
| Sorbi1     |                  |                  |       |               | VEYFLAEALQSYRAE  | ETELINLSAGDYIV   |     |     |
| Sorbi2     |                  |                  |       |               | VDFFLCEALDSFKAE  | ESELINLSAGDIIV   |     |     |
| Vivin1     |                  |                  |       |               | MGYFLCEVMHSEQAE  | DVELINLSVGDHVV   |     |     |
| Vivin2     |                  |                  |       |               | ISYFLCEVMHSTQAE  | DVELINLSIGDFVV   |     |     |
| ArathSH3P3 |                  |                  |       |               | TSYFLAEVLHPPESAA | EKELDLKGDYIV     |     |     |
| Bradi4     |                  |                  |       |               | AQYFLAEAMHNFGT   | EKELSLIVGDYIV    |     |     |
| Orysa4     |                  |                  |       |               | AQYFLAEAMHNFGT   | EKELSLIVGDYVV    |     |     |
| Potri5     |                  |                  |       |               | TTYFLAEAMHPIAE   | EKELSLAVGDCIV    |     |     |
| Solyc4     |                  |                  |       |               | TKYFLAEAMHSEAE   | EKELSLSVGDYVV    |     |     |
| Sotub4     |                  |                  |       |               | TKYFLAEAMHSEAE   | EKELSLSVGDYVV    |     |     |
| Sorbi4     |                  |                  |       |               | AQYFLAEAMHNFGT   | EKELSLIVGDYVV    |     |     |
| Vivin4     |                  |                  |       |               | TMYFLAEAMHESAA   | EKELSLNVGDYVV    |     |     |

|            | 410                     | 420                    | 430             | 440 | 450 |
|------------|-------------------------|------------------------|-----------------|-----|-----|
| ArathSH3P1 | VRQVAGTGNSEGEKKGWFS     | SAYVEKQEKAPASKI        | -VESNSKQQ       |     |     |
| Potri3     | VRKVAPTGNSEGECKKKGWFS   | SAYTEKHAKAPASKI        | -MEESSTP        |     |     |
| Potri4     | VRQVAPTGNSEGECKKKGWFS   | SAYTEKHENSPERAT        | -SVSELLKAIPSGMV |     |     |
| Vivin3     | VRQVAPNGNSEGECKKTAGWFS  | SAYVERROKAPASVI        | -NEEASLAMIPN    |     |     |
| Solyc3     | VRQVAPNGNSEGECKKKGWFS   | SAYAVMSDEVAASKM        | -VETDTTP        |     |     |
| Sotub3     | VRQVAPNGNSEGECKKTAGWFS  | SAYAVKSDEVAASKM        | -VETDTTP        |     |     |
| Amtri2     | VRQVAPAGNSEGECKKKGWFS   | SAYTELROKAPASKI        | -SDIDPQS        |     |     |
| Bradi3     | VRQVARNNGNSEGECKKKGWFS  | SAYVQORDKAPASKV        | -IEPGLLTA       |     |     |
| Sorbi3     | VRQVAPANGNSEGECKKKGWFS  | SAYVEQROKAPASKV        | -IEPGLLTT       |     |     |
| Orysa3     | VRQVAPNGNSEGECKKKGWFS   | SAYVEQROKAPASKV        | -IEPGLLTT       |     |     |
| ArathSH3P2 | VRKVAGSGNAGEGECKKKGWFS  | YGYIERRERV LASKV       | -SEVF           |     |     |
| Amtri1     | VRKVARTGNAGEGECKKKGWFS  | SDYIERRERV LANKV       | -AEVF           |     |     |
| Bradi1     | VRKVSNNGNAGEGECKKKGWFS  | SEYIEKRORV LASKV       | -AQVF           |     |     |
| Bradi2     | VRKVSNNGNAGEGECKKKGWFS  | HAYIERRERV LASKV       | -PHIF           |     |     |
| Orysa1     | VRKVSNNGNAGEGECKKKGWFS  | YDYIEKRORV LASKV       | -AQVF           |     |     |
| Orysa2     | VRKVSTNGNAGEGECKKKGWFS  | HGYIERRERV LASKV       | -PHIF           |     |     |
| Potri1     | VRKVSNNGNAGEGECKKKGWFS  | YGYIERRORV LASKI       | -AEVF           |     |     |
| Potri2     | VRKVSNNGNAGEGECKKKGWFS  | YGYIERRORV LASKI       | -AEVF           |     |     |
| Solyc1     | IRKVSNNGNAGEGECKKKGWFS  | FGYIERRORV LASKV       | -AEVF           |     |     |
| Solyc2     | VRKVSNNGNAGEGECKKKGWFS  | FGYVERRERILATKV        | -AEVF           |     |     |
| Sotub1     | IRKVSNNGNAGEGECKKKGWFS  | FGYIERRORV LASKV       | -AEVF           |     |     |
| Sotub2     | VRKVSNNGNAGEGECKKKGWFS  | FGYVERRERILATKV        | -AEVF           |     |     |
| Sorbi1     | VRKVSNNGNAGEGECKKKGWFS  | YDYIEKRERV LASKV       | -AQVF           |     |     |
| Sorbi2     | VRKVSNNGNAGEGECKKKGWFS  | HAYIERQERV LASKV       | -PHIF           |     |     |
| Vivin1     | IRKVSNNGNAGEGECKKKGWFS  | VGYIERRERV LASKI       | -V              |     |     |
| Vivin2     | VRKVSNNGNAGEGECKKKGWFS  | FGYIEKRERV LASKM       | -AEVF           |     |     |
| ArathSH3P3 | VRKVAPQTGNAGEGECKKKGWFS | MAAYIEKRORLPTTNFAAEVY  |                 |     |     |
| Bradi4     | VRQVAPNGNAGEGECKKKGWFS  | AGYVERRENIPP NKVFPQA   |                 |     |     |
| Orysa4     | VRQVAPNGNAGEGECKKKGWFS  | AAAYVERRENIPP NKVFPQA  |                 |     |     |
| Potri5     | VRKVAPPTGNAGEGECKKKGWFS | SAAYIEKRORMSTSLA-AQAY  |                 |     |     |
| Solyc4     | VRKVAPQGNAGEGECKKKGWFS  | SEAYIEKRORVPTSN GATEAY |                 |     |     |
| Sotub4     | VRKVAPQGNAGEGECKKKGWFS  | SEAYIEKRORVPTSN GATEVY |                 |     |     |
| Sorbi4     | VRQVAPNGNAGEGECKKKGWFS  | AAAYVERRENIPP NKVFPQA  |                 |     |     |
| Vivin4     | VRKVAPHTGNAGEGECKKKGWFS | SEAYIAKRORLPTSNVAAEVY  |                 |     |     |

**Supplementary Table S2:** List of primers used for restriction enzyme-based cloning into yeast two hybrid vectors with restriction enzymes used and names indicating final destination vectors

| Gene  | Primer sequence 5' - 3'          | Enzyme | Primer name    |
|-------|----------------------------------|--------|----------------|
| SH3P2 | TTGGATCCGCAGAAACCCGCATCAACTC     | BamHI  | SH3P2_pGAD_for |
|       | TTGAATTCTGTGAATAGCTCTTGATCTGGTGA | EcoRI  | SH3P2_pGAD_rev |
| SH3P3 | TTCTCGAGGTAGTTTGTGGGGACAGGACA    | XhoI   | SH3P3_pGAD_for |
|       | TTGAATTCGGGAAATCAAGAGGAGAAGTGAC  | EcoRI  | SH3P3_pGAD_rev |
| FH5   | TTCATATGTACTCTGTTGGTTCCTCCATCAA  | NdeI   | FH5_pGBKT7_for |
|       | TTCTGCAGAACTAGACTGATCCACGCGTCT   | PstI   | FH5_pGBKT7_rev |
|       | TTCATATGTACTCTGTTGGTTCCTCCATCAA  | NdeI   | FH5_pGAD_for   |
|       | TTCCCGGGAAGCTAGACTGATCCACGCGTCT  | XmaI   | FH5_pGAD_rev   |

**Supplementary Table S3:** List of primers used for cloning into Gateway™ compatible vectors, PCR amplification of coding sequence with recombination sites and cloning into donor vectors for creating vectors for transient expression experiments. Primers M13for and M13rev were used for amplification of coding sequences of all three genes with recombination sites from pDONOR221 vectors for recombination into target vectors.

| Gene  | Primer sequence 5' - 3'                                    | Vector (target)                      | Primer name      |
|-------|------------------------------------------------------------|--------------------------------------|------------------|
| SH3P1 | GGGGACAAGTTTGTACAAAAAAGCAGGCTTAATGGAAGCTATAAGAAAGCAAGCTG   | pDONOR221<br>(pGBKT7gw,<br>pGADT7gw) | SH3P1_CDSgw for  |
|       | GGGGACCACTTTGTACAAAGAAAGCTGGGTACTGTTGCTTGGAGTTTGATTCCA     |                                      | SH3P1_CDSgw rev  |
| SH3P2 | GGGGACAAGTTTGTACAAAAAAGCAGGCTTAATGGATGCAATTAGAAAACAAGC     | pDONOR221<br>(pGBKT7gw)              | SH3P2_for_gw     |
|       | GGGGACCACTTTGTACAAAGAAAGCTGGGTATCAGAAACTTCGGACACTTT        |                                      | SH3P2_rev_gw     |
| SH3P3 | GGGGACAAGTTTGTACAAAAAAGCAGGCTTAATGGATGCGTTTAGAAGACAAGC     | pDONOR221<br>(pB7m34GW)              | SH3P3 cds for gw |
|       | GGGGACCACTTTGTACAAAGAAAGCTGGGTATCAGTAACTTCAGCAGCAAAGTT     |                                      | SH3P3 cds rev gw |
| FH5   | GGGGACAAGTTTGTACAAAAAAGCAGGCTTAATGGTTGGAATGATTCGAGGAGG     | pDONOR221<br>(pB7m34GW)              | FH5_for_gw       |
|       | GGGGACCACTTTGTACAAAGAAAGCTGGGTAGTCTGAATCTGAACTAGACTGATCCAC |                                      | FH5_rev_gw       |
| DRP1A | GGGGACAAGTTTGTACAAAAAAGCAGGCTTAATGGAAAATCTGATCTCTCTGGTT    | pDONOR221<br>(pGBKT7gw)              | DRP1_for_gw      |
|       | GGGGACCACTTTGTACAAAGAAAGCTGGGTATCACTTGGACCAAGCAACA         |                                      | DRP1_rev_gw      |
| All   | GTAAACGACGGCCAGT<br>AACAGCTATGACCAT                        | pGBKT7gw                             | M13for<br>M13rev |
